# Supplementary material
Source: publisher site journal article supplement (https://www.dovepress.com/article/305443)
Supplement: Supplementary file 1 [file get_supplementary_file.php]

Figure Supp2. MAOB expression levels depending on rs3027452 genotype. Analysis on Frontal Cortex (BA9) of 175 control subjects available from GTEX portal (TT, n=22; CT, n=15; CC, n=138) p-value= 6.5e-126)

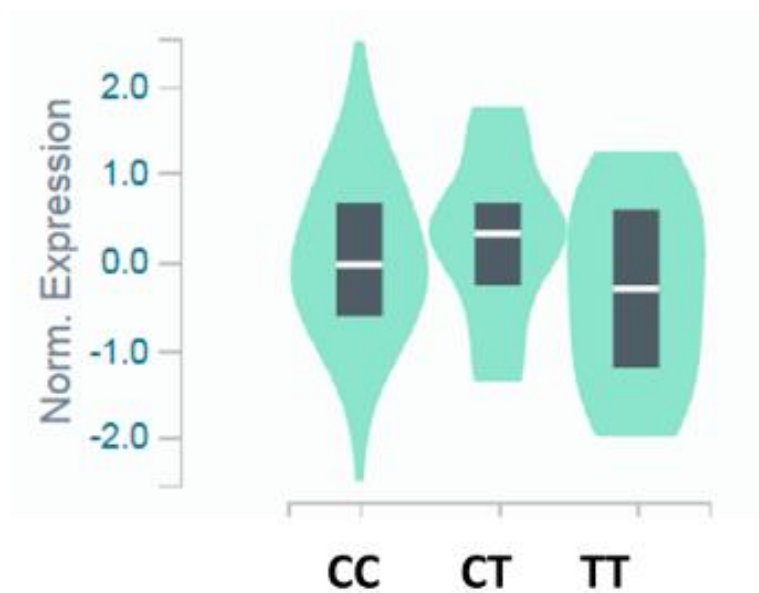

Supplementary table 1. Genotype counts and Hardy-Weinberg analysis.

| Gene | Chr   | Base pair (hg38) | SNP ID    | Genotype | N  | HWE p-value |
|------|-------|------------------|-----------|----------|----|-------------|
| TPH1 | Chr11 | 18026269         | rs1800532 | GG       | 22 | p=0.354     |
|      |       |                  |           | GT       | 39 |             |
|      |       |                  |           | TT       | 11 |             |
| MAOA | ChrX  | 43658366         | rs3788862 | AA       | 10 | p=0.054     |
|      |       |                  |           | AG       | 24 |             |
|      |       |                  |           | GG       | 40 |             |
|      |       | 43742366         | rs979605  | AA       | 10 | p=0.077     |
|      |       |                  |           | AG       | 24 |             |
|      |       |                  |           | GG       | 37 |             |
| MAOB | ChrX  | 43798792         | rs3027452 | AA       | 3  | p=0.004     |
|      |       |                  |           | AG       | 9  |             |
|      |       |                  |           | GG       | 64 |             |
| COMT | Chr22 | 19962429         | rs6269    | AA       | 23 | p=0.471     |
|      |       |                  |           | GA       | 30 |             |
|      |       |                  |           | GG       | 14 |             |
|      |       | 19963748         | rs4680    | AA       | 18 | p=0.215     |
|      |       |                  |           | AG       | 31 |             |
|      |       |                  |           | GG       | 24 |             |

Supplementary table 2. Interdependence of the different subscales under evaluation.

|                 |              |                        | GHQ (Δ T-Scores)       |                |                 |                 |                 |                 | POMS (Δ)        |                 |                   |                 |
|-----------------|--------------|------------------------|------------------------|----------------|-----------------|-----------------|-----------------|-----------------|-----------------|-----------------|-------------------|-----------------|
|                 |              |                        | Depression             | Anger          | Vigor           | Fatigue         | Friendships     | TMD             | Somatization    | Anxiety         | Social Disfuncion | Depression      |
| GHQ (Δ T-Score) | Tension      | Pearson (r)<br>p-value | ,639<br><0,001         | ,532<br><0,001 | -,337<br>0,002  | ,568<br>0,000   | -,295<br>0,008  | ,758<br>0,000   | ,472<br>0,000   | ,471<br>0,000   | ,440<br>0,000     | ,303<br>0,006   |
|                 | Depression   | Pearson (r)<br>p-value |                        | ,766<br><0,001 | -,613<br><0,001 | ,687<br><0,001  | -,380<br>0,001  | ,932<br><0,001  | ,658<br><0,001  | ,607<br><0,001  | ,530<br><0,001    | ,538<br><0,001  |
|                 | Anger        | Pearson (r)<br>p-value |                        |                | -,565<br><0,001 | ,596<br><0,001  | -,476<br><0,001 | ,840<br><0,001  | ,543<br><0,001  | ,550<br><0,001  | ,493<br><0,001    | ,433<br><0,001  |
|                 | Vigor        | Pearson (r)<br>p-value |                        |                |                 | -,697<br><0,001 | ,508<br><0,001  | -,708<br><0,001 | -,618<br><0,001 | -,463<br><0,001 | -,516<br><0,001   | -,391<br><0,001 |
|                 | Fatigue      | Pearson (r)<br>p-value |                        |                |                 |                 | -,322<br>0,004  | ,841<br><0,001  | ,566<br><0,001  | ,399<br><0,001  | ,486<br><0,001    | ,264<br>0,018   |
|                 | Friendship   | Pearson (r)<br>p-value |                        |                |                 |                 |                 | -,380<br>0,001  | -,290<br>0,009  | -,343<br>0,002  | -,289<br>0,009    | -,210<br>0,062  |
|                 | TMD          | Pearson (r)<br>p-value |                        |                |                 |                 |                 |                 | ,688<br><0,001  | ,604<br><0,001  | ,586<br><0,001    | ,482<br><0,001  |
|                 | Somatization | Pearson (r)<br>p-value |                        |                |                 |                 |                 |                 |                 | ,705<br><0,001  | ,633<br><0,001    | ,513<br><0,001  |
| POMS (Δ)        | Cronic       | Anxiety                | Pearson (r)<br>p-value |                |                 |                 |                 |                 |                 |                 |                   | ,642<br><0,001  |
|                 |              | Social Disfuncion      | Pearson (r)<br>p-value |                |                 |                 |                 |                 |                 |                 |                   | ,427<br><0,001  |
|                 |              | Depression             | Pearson (r)<br>p-value |                |                 |                 |                 |                 |                 |                 |                   |                 |
|                 |              |                        |                        |                |                 |                 |                 |                 |                 |                 |                   |                 |

Supplementary table 3. Correlation between the basal subscale scores and the Trp supplementation effect.

|                                   |         | $\Delta T\_Score\_Tension$ | $\Delta T\_Score\_Depression$ | $\Delta T\_Score\_Anger$ | $\Delta T\_Score\_Vigor$ | $\Delta T\_Score\_Fatigue$ | $\Delta T\_Score\_Friendship$ | $\Delta T\_score\_TMD$ | POMS <sub>A</sub>   | POMS <sub>AB</sub>  | POMS <sub>AC</sub>  | POMS <sub>AD</sub>  |
|-----------------------------------|---------|----------------------------|-------------------------------|--------------------------|--------------------------|----------------------------|-------------------------------|------------------------|---------------------|---------------------|---------------------|---------------------|
| BASAL_T_Score_Tension             | Rho     | -.357 <sup>**</sup>        | -.206                         | -.082                    | 0,063                    | -.107                      | -.054                         | -.244 <sup>*</sup>     | -.138               | -.284 <sup>*</sup>  | -.273 <sup>*</sup>  | -.0223              |
|                                   | p-value | 0,003                      | 0,094                         | 0,512                    | 0,614                    | 0,387                      | 0,664                         | 0,047                  | 0,266               | 0,020               | 0,026               | 0,070               |
| BASAL_T_Score_Depression          | Rho     | -.0215                     | -.515 <sup>**</sup>           | -.300 <sup>**</sup>      | ,396 <sup>**</sup>       | -.270 <sup>*</sup>         | ,299 <sup>*</sup>             | -.404 <sup>**</sup>    | -.0239              | -.368 <sup>**</sup> | -.314 <sup>**</sup> | -.0175              |
|                                   | p-value | 0,081                      | 0,000                         | 0,014                    | 0,001                    | 0,027                      | 0,014                         | 0,001                  | 0,051               | 0,002               | 0,010               | 0,157               |
| BASAL_T_Score_Anger               | Rho     | -.0173                     | -.367 <sup>**</sup>           | -.564 <sup>**</sup>      | ,289 <sup>*</sup>        | -.176                      | 0,196                         | -.379 <sup>**</sup>    | -.0160              | -.0227              | -.0240              | -.0077              |
|                                   | p-value | 0,161                      | 0,002                         | 0,000                    | 0,018                    | 0,155                      | 0,113                         | 0,002                  | 0,197               | 0,065               | 0,050               | 0,538               |
| BASAL_T_Score_Vigor               | Rho     | 0,026                      | ,248 <sup>*</sup>             | 0,171                    | -.387 <sup>**</sup>      | ,310 <sup>*</sup>          | -.253 <sup>*</sup>            | ,267 <sup>*</sup>      | 0,151               | ,258 <sup>*</sup>   | 0,182               | 0,076               |
|                                   | p-value | 0,836                      | 0,043                         | 0,167                    | 0,001                    | 0,011                      | 0,039                         | 0,029                  | 0,222               | 0,035               | 0,140               | 0,542               |
| BASAL_T_Score_Fatigue             | Rho     | -.275 <sup>*</sup>         | -.422 <sup>**</sup>           | -.329 <sup>**</sup>      | ,470 <sup>**</sup>       | -.571 <sup>**</sup>        | 0,218                         | -.520 <sup>**</sup>    | -.257 <sup>*</sup>  | -.342 <sup>**</sup> | -.301 <sup>*</sup>  | -.0209              |
|                                   | p-value | 0,024                      | 0,000                         | 0,007                    | 0,000                    | 0,000                      | 0,077                         | 0,000                  | 0,035               | 0,005               | 0,013               | 0,090               |
| BASAL_T_Score_Friendship          | Rho     | -0,050                     | 0,056                         | 0,109                    | -0,144                   | 0,191                      | -.564 <sup>**</sup>           | 0,037                  | 0,019               | 0,128               | 0,125               | -0,086              |
|                                   | p-value | 0,687                      | 0,655                         | 0,379                    | 0,243                    | 0,121                      | 0,000                         | 0,764                  | 0,879               | 0,301               | 0,313               | 0,489               |
| BASAL_T_score_TMD                 | Rho     | -.267 <sup>*</sup>         | -.473 <sup>**</sup>           | -.396 <sup>**</sup>      | ,381 <sup>**</sup>       | -.312 <sup>*</sup>         | 0,155                         | -.464 <sup>**</sup>    | -.0239              | -.368 <sup>**</sup> | -.322 <sup>**</sup> | -.0186              |
|                                   | p-value | 0,029                      | 0,000                         | 0,001                    | 0,001                    | 0,010                      | 0,212                         | 0,000                  | 0,051               | 0,002               | 0,008               | 0,132               |
| POMS_BASAL_A (Somatization)       | Rho     | -.277 <sup>*</sup>         | -.411 <sup>**</sup>           | -.0212                   | ,284 <sup>*</sup>        | -.353 <sup>**</sup>        | 0,093                         | -.401 <sup>**</sup>    | -.631 <sup>**</sup> | -.528 <sup>**</sup> | -.321 <sup>**</sup> | -.360 <sup>**</sup> |
|                                   | p-value | 0,023                      | 0,001                         | 0,085                    | 0,020                    | 0,003                      | 0,456                         | 0,001                  | 0,000               | 0,000               | 0,008               | 0,003               |
| POMS_BASAL_B (Anxiety)            | Rho     | -0,073                     | -0,141                        | -0,049                   | 0,145                    | 0,003                      | -0,016                        | -0,135                 | -0,223              | -.644 <sup>**</sup> | -.304 <sup>*</sup>  | -.383 <sup>**</sup> |
|                                   | p-value | 0,556                      | 0,254                         | 0,696                    | 0,242                    | 0,980                      | 0,897                         | 0,276                  | 0,070               | 0,000               | 0,012               | 0,001               |
| POMS_BASAL_C (Social disfunction) | Rho     | -.294 <sup>*</sup>         | -.257 <sup>*</sup>            | -0,124                   | ,279 <sup>*</sup>        | -0,204                     | 0,027                         | -.278 <sup>*</sup>     | -.289 <sup>*</sup>  | -.309 <sup>*</sup>  | -.705 <sup>**</sup> | -.0200              |
|                                   | p-value | 0,016                      | 0,036                         | 0,317                    | 0,022                    | 0,097                      | 0,829                         | 0,023                  | 0,018               | 0,011               | 0,000               | 0,104               |
| POMS_BASAL_D (Depression)         | Rho     | -0,050                     | 0,009                         | 0,048                    | 0,052                    | 0,034                      | -0,088                        | -0,001                 | -0,087              | -.316 <sup>**</sup> | -0,165              | -.577 <sup>**</sup> |
|                                   | p-value | 0,686                      | 0,943                         | 0,700                    | 0,674                    | 0,784                      | 0,478                         | 0,997                  | 0,482               | 0,009               | 0,182               | 0,000               |

Supplementary table 4. Effect of the genotype over the different  $\Delta$  scores measured upon Trp supplementation.

|      |           |    | $\Delta$ T_Score Tension |    | $\Delta$ T_Score Depression |    | $\Delta$ T_Score Anger |    | $\Delta$ T_Score Vigor |    | $\Delta$ T_Score Fatigue |    | $\Delta$ T_Score Friendship |    | $\Delta$ T_score TMD |    | $\Delta$ POMS Somatization |    | $\Delta$ POMS Anxiety |    | $\Delta$ POMS Social dysfunction |    | $\Delta$ POMS Depression |    |
|------|-----------|----|--------------------------|----|-----------------------------|----|------------------------|----|------------------------|----|--------------------------|----|-----------------------------|----|----------------------|----|----------------------------|----|-----------------------|----|----------------------------------|----|--------------------------|----|
|      |           |    | Average                  | N  | Average                     | N  | Average                | N  | Average                | N  | Average                  | N  | Average                     | N  | Average              | N  | Average                    | N  | Average               | N  | Average                          | N  | Average                  | N  |
| TPH1 | rs1800532 | GG | -0,68                    | 18 | -2,01                       | 18 | -4,37                  | 18 | 6,02                   | 18 | -2,17                    | 18 | 4,25                        | 18 | -3,03                | 18 | -1,22                      | 18 | -1,50                 | 18 | -1,28                            | 18 | -0,83                    | 18 |
|      |           | GT | -2,11                    | 33 | -3,18                       | 33 | -4,25                  | 33 | 3,42                   | 33 | -4,89                    | 33 | 0,61                        | 33 | -4,33                | 33 | -0,76                      | 33 | -0,76                 | 33 | -0,67                            | 33 | 0,03                     | 33 |
|      |           | TT | -7,19                    | 11 | -6,33                       | 11 | -6,07                  | 11 | 9,05                   | 11 | -8,59                    | 11 | 2,42                        | 11 | -8,74                | 11 | -1,64                      | 11 | -1,00                 | 11 | -1,18                            | 11 | -0,18                    | 11 |
| MAOA | rs3788862 | AA | -5,46                    | 9  | -7,84                       | 9  | -5,68                  | 9  | 9,58                   | 9  | -11,23                   | 9  | 5,91                        | 9  | -9,02                | 9  | -1,89                      | 9  | -1,22                 | 9  | -2,00                            | 9  | -0,67                    | 9  |
|      |           | AG | -4,09                    | 21 | -4,90                       | 21 | -7,67                  | 21 | 6,95                   | 21 | -5,51                    | 21 | 3,17                        | 21 | -6,79                | 21 | -1,76                      | 21 | -1,67                 | 21 | -1,52                            | 21 | -0,48                    | 21 |
|      |           | GG | -1,44                    | 34 | -1,35                       | 34 | -2,70                  | 34 | 2,73                   | 34 | -3,26                    | 34 | 0,10                        | 34 | -2,68                | 34 | -0,41                      | 34 | -0,53                 | 34 | -0,41                            | 34 | -0,06                    | 34 |
| MAOA | rs979605  | AA | -3,03                    | 9  | -1,90                       | 9  | -2,18                  | 9  | 4,92                   | 9  | -4,17                    | 9  | -1,11                       | 9  | -3,82                | 9  | -1,89                      | 9  | -1,22                 | 9  | -2,11                            | 9  | -0,22                    | 9  |
|      |           | AG | -3,31                    | 21 | -4,63                       | 21 | -5,80                  | 21 | 6,21                   | 21 | -4,42                    | 21 | 3,64                        | 21 | -5,60                | 21 | -1,33                      | 21 | -1,62                 | 21 | -0,71                            | 21 | -0,43                    | 21 |
|      |           | GG | -1,89                    | 31 | -3,04                       | 31 | -4,31                  | 31 | 4,57                   | 31 | -4,99                    | 31 | 1,29                        | 31 | -4,38                | 31 | -0,65                      | 31 | -0,58                 | 31 | -0,77                            | 31 | -0,16                    | 31 |
| MAOB | rs3027452 | AA | 15,01                    | 2  | 21,93                       | 2  | 22,93                  | 2  | -8,85                  | 2  | 13,85                    | 2  | -16,61                      | 2  | 20,48                | 2  | 1,50                       | 2  | 1,00                  | 2  | 2,00                             | 2  | 2,50                     | 2  |
|      |           | AG | -4,43                    | 8  | -4,41                       | 8  | -4,42                  | 8  | -1,38                  | 8  | -1,63                    | 8  | 2,91                        | 8  | -3,73                | 8  | -1,75                      | 8  | -1,25                 | 8  | -1,38                            | 8  | 0,00                     | 8  |
|      |           | GG | -3,55                    | 55 | -4,37                       | 55 | -5,93                  | 55 | 6,76                   | 55 | -6,64                    | 55 | 2,48                        | 55 | -6,28                | 55 | -1,04                      | 55 | -1,02                 | 55 | -1,13                            | 55 | -0,42                    | 55 |
| COMT | rs6269    | AA | -3,37                    | 19 | -4,77                       | 19 | -5,65                  | 19 | 5,24                   | 19 | -5,49                    | 19 | 4,55                        | 19 | -5,61                | 19 | -1,21                      | 19 | -1,16                 | 19 | -0,63                            | 19 | -0,37                    | 19 |
|      |           | GA | -1,41                    | 27 | -2,40                       | 27 | -6,40                  | 27 | 5,24                   | 27 | -5,85                    | 27 | 0,74                        | 27 | -4,92                | 27 | -0,78                      | 27 | -0,78                 | 27 | -0,70                            | 27 | -0,19                    | 27 |
|      |           | GG | -0,68                    | 12 | 1,03                        | 12 | 1,64                   | 12 | 3,87                   | 12 | 1,36                     | 12 | 0,28                        | 12 | 0,35                 | 12 | -0,58                      | 12 | -0,50                 | 12 | -1,42                            | 12 | -0,33                    | 12 |
| COMT | rs4680    | AA | -3,27                    | 15 | -5,08                       | 15 | -5,59                  | 15 | 4,72                   | 15 | -6,30                    | 15 | 4,87                        | 15 | -5,74                | 15 | -1,67                      | 15 | -1,53                 | 15 | -0,73                            | 15 | -0,33                    | 15 |
|      |           | AG | -1,89                    | 26 | -4,14                       | 26 | -7,15                  | 26 | 4,60                   | 26 | -5,64                    | 26 | 1,41                        | 26 | -5,66                | 26 | -0,96                      | 26 | -1,19                 | 26 | -0,85                            | 26 | -0,31                    | 26 |
|      |           | GG | -3,10                    | 22 | -1,21                       | 22 | -1,01                  | 22 | 5,73                   | 22 | -3,04                    | 22 | 0,30                        | 22 | -3,01                | 22 | -0,73                      | 22 | -0,45                 | 22 | -1,23                            | 22 | -0,23                    | 22 |
